# Recent Trends and Effectiveness of Antiretroviral Regimens Among Men Who Have Sex With Men Living With HIV in the United States: The Multicenter AIDS Cohort Study (MACS) 2008–2017

Xiuhong Li,<sup>1</sup> Todd T. Brown,<sup>2</sup> Kenneth S. Ho,<sup>3</sup> Mallory D. Witt,<sup>4</sup> John Phair,<sup>5</sup> and Lisa P. Jacobson<sup>1</sup>

<sup>1</sup>Department of Epidemiology, Johns Hopkins Bloomberg School of Public Health, Baltimore, Maryland; <sup>2</sup>Division of Endocrinology, Diabetes, and Metabolism, Johns Hopkins University School of Medicine, Baltimore, Maryland; <sup>3</sup>Department of Medicine, Division of Infectious Diseases, University of Pittsburgh School of Medicine, Pennsylvania; <sup>4</sup>Division of HIV Medicine, Los Angeles Biomedical Research Institute at Harbor-UCLA Medical Center, Torrance, California; <sup>5</sup>Department of Medicine, Division of Infectious Diseases, Northwestern University Feinberg School of Medicine, Chicago, Illinois

**Objective:** We evaluated trends and population effectiveness (tolerability, HIV suppression) of current combination antiretroviral therapy (cART) regimens mindful of treatment guidelines.

**Method:** Trend analyses included 18 017 person-visits (1457 men) on cART during 2008–2017 in the Multicenter AIDS Cohort Study. Effectiveness analyses of current regimens used 3598 person-visit-pairs (745 men) on cART in 2014–2017. Inverse-probability-of-treatment-and-censoring weighted Poisson regression with robust variances was used to evaluate the association between regimens and switching, adherence and HIV RNA <20 copies/mL.

**Results:** Integrase strand transfer inhibitor (INSTI)-based regimen usage has increased since 2008. Almost 90% of cART initiators started with INSTI-cART in 2016–2017; cART adherence was stable around 90% and 83%–85% suppressed virus (<20 cp/mL). Commonly used regimens in 2014–2017 contained disoproxil fumarate/emtricitabine (TDF/FTC) backbone with efavirenz (EFV, n = 1161 person-visits), elvitegravir/cobicistat (EVG/c, n = 551), rilpivirine (RPV, n = 492), darunavir/ritonavir (DRV/r, n = 351), or atazanavir (ATV)/r (n = 333). Others were dolutegravir/abacavir/lamivudine (DTG/ABC/3TC, n = 401) and EVG/c/tenofovir alafenamide/FTC (EVG/c/TAF/FTC, n = 309). Compared to EFV/TDF/FTC users, ATV/r+TDF/FTC users switched more (rate ratio [RR] = 1.80, 95% confidence interval [CI], 1.17–2.76), while those on DTG/ABC/3TC (RR [95% CI] = 0.16 [0.08–0.31]) or EVG/c/TAF/FTC (RR [95% CI] = 0.12 [0.06–0.27]) switched less. The rate of suppressed HIV RNA was 15% (95% CI, 2%–26%) lower among younger EVG/c/TDF/FTC users and 18% (95% CI, 3%–34%) higher in older DRV/r+TDF/FTC users; adherence did not differ by regimen.

**Conclusions:** Consistent with guidelines, recent cART initiators started with INSTI-cART, which was associated with less switching early after initiation. Factors beyond those studied here, such as need for salvage therapy, unique personal characteristics, drug interactions, and cost may influence treatment decisions.

**Key words.** cART; effectiveness; guidelines; IPTC weighted model; trend.

## INTRODUCTION

Combination antiretroviral therapy (cART) that contains 3 active drugs from 2 or more drug classes [1] has been available to treat HIV infection for 2 decades. Many studies have shown the effectiveness of cART for reducing HIV-related morbidity

and mortality [2–7] by suppressing HIV and increasing CD4+ cell count [8–10]. Current cART regimens [11] do not eradicate HIV; restoring immunologic function and suppressing HIV RNA are primary treatment goals [1].

The emergence of integrase strand transfer inhibitors (INSTI) in 2007 and new multiclass single-pill drugs containing INSTI elvitegravir (EVG), bicittegravir, or dolutegravir (DTG) after 2013 have broadened cART options. Reports on cART trends in the US in 2000–2008 [12] mainly assessed the patterns of protease inhibitor (PI) and nonnucleoside reverse transcriptase inhibitor (NNRTI) use among cART initiators. A recent publication showed that the percentage receiving an INSTI regimen increased from 10% to 40% between 2009 and 2016 in British Columbia's Centre for Excellence in HIV/AIDS Drug Treatment Program in Canada [13]. Little is known about the uptake of

Received 22 March 2019; editorial decision 12 July 2019; accepted 15 July 2019.

Correspondence: Lisa P. Jacobson, ScD, Department of Epidemiology, Johns Hopkins University Bloomberg School of Public Health, 615 N. Wolfe St., Room E7646, Baltimore, MD 21205 (ljacob1@jhu.edu).

Open Forum Infectious Diseases®

© The Author(s) 2019. Published by Oxford University Press on behalf of Infectious Diseases Society of America. This is an Open Access article distributed under the terms of the Creative Commons Attribution License (<http://creativecommons.org/licenses/by/4.0/>), which permits unrestricted reuse, distribution, and reproduction in any medium, provided the original work is properly cited. DOI: 10.1093/ofid/ofz333

INSTI-containing regimens in people with HIV in the United States. Although clinical trials demonstrated their comparable efficacy to other cART [14–19], their effectiveness in real-life settings has not been fully studied. Effectiveness may be measured by drug tolerability, indicated by switching and adherence, and by HIV RNA suppression.

Here, we describe use of cART classes and regimens overall and as initial therapy in the population-based Multicenter AIDS Cohort Study (MACS) in 2008–2017 and evaluate the effectiveness of commonly used current (2014–2017) regimens by examining their associations with switching, adherence, and suppressed HIV RNA (<20 copies/mL).

## METHODS

### Study Population

In MACS, an ongoing cohort study of men who have sex with men (MSM) [20–22], 7357 men were recruited, including 385 since 2010, in Baltimore/Washington D.C.; Chicago; Los Angeles (LA); Columbus (Ohio); and Pittsburgh. Participants return every 6 months for interviews, physical examinations, and blood collection for concomitant laboratory testing and storage. Study questionnaires are available at <https://statepi.jhsph.edu/macsf/forms.html>. Center-specific institutional review boards approved the protocols, and participants provided informed consent. The cART trend analysis included participants on cART between January 1, 2008, and December 31, 2017. Comparative effectiveness analyses of current regimens, particularly INSTI-cART approved after 2013, included participants on cART during January 1, 2014, to December 31, 2017, and who were seen for at least 2 consecutive study visits (visit-pairs  $V_i$  and  $V_{i+1}$  within 1 year), where the first visit,  $V_i$ , was defined as the index visit.

### cART Regimens

Self-reported use of antiretroviral therapy at each visit was summarized to define cART, according to the United States Department of Health and Human Services Panel guidelines [1]. Protease inhibitor-cART was defined if cART regimens contained a boosted PI; NNRTI-cART if regimens contained a NNRTI without PI; and INSTI-cART if regimens contained an INSTI without PI and NNRTI. Regimens reported by >300 person-visits in 2014–2017 were included in order to have sufficient sample sizes.

### Outcomes

Three outcomes were used to compare the effectiveness of the current regimens: switching, adherence, and HIV-1 RNA suppression (<20 copies/mL). Switching occurred if the regimen reported at the next consecutive visit ( $V_{i+1}$ ) differed from that reported at the index visit ( $V_i$ ) or if participants discontinued ART at  $V_{i+1}$ . A standardized measure of adherence (100% vs <100%) was calculated based on comparing self-reported to prescribed

use of each medication in the prior 4 days [23]. To reflect adherence associated with chronic medication use, we required individuals to be on the same regimen for at least 2 consecutive visits ( $V_i$ ,  $V_{i+1}$ ) and assessed adherence at  $V_{i+1}$ . Using the COBAS AmpliPrep TaqMan assay (Roche Molecular Systems, Branchburg, NJ) (lower detection limit of 20 copies/mL, available after 2011), HIV RNA plasma levels were measured at each visit [24], and the analyses of HIV RNA suppression at  $V_{i+1}$  included only individuals who used the same regimen at  $V_i$  and  $V_{i+1}$  (ie, the same population used for examining adherence). For analyses of suppressed HIV RNA from 2008–2017, we used 50 copies/mL as cutoff to include Roche ultrasensitive test results.

### Covariates

Time-fixed covariates included race/ethnicity (Caucasian [reference], African American, and Hispanic or other race), study site, and time of cohort entry (pre- or post-2001). Time-varying covariates at  $V_{i-1}$  (1 visit before  $V_i$ ) included age (using a restricted quadratic spline with 4 knots at 20<sup>th</sup>, 40<sup>th</sup>, 60<sup>th</sup>, and 80<sup>th</sup> percentiles of age [25]), presence of depressive symptoms (a score  $\geq 16$  on the Center for Epidemiology Studies-Depression questionnaire), HCV infection (HCV RNA quantified), smoking status (current, past, never [reference]), and use of the following since last visit: alcohol drinking ( $\geq 14$  (heavy drinking) vs <14 drinks [reference] per week), marijuana, and any use of other recreational drugs (poppers, any cocaine, methamphetamines, heroin, or other street drugs). We also included kidney disease (estimated glomerular filtration rate ( $eGFR_{MDRD}$ ) < 60 mL/min/1.73m<sup>2</sup> body surface area or proteinuria  $\geq 200$  mg/g creatinine), CD4 cell count (<350, 350–499,  $\geq 500$  cells/mm<sup>3</sup> [reference]), and detectable HIV RNA ( $\geq 20$  vs <20 [reference] copies/mL) at  $V_{i-1}$ . Gastrointestinal (GI) symptoms (diarrhea, nausea, vomiting, abdominal pain, or bloating) and central nervous system (CNS) sleep-related symptoms (nightmares, vivid dreams, or insomnia) at  $V_{i-1}$  used the information about the period since the prior visit. Covariates from  $V_{i-1}$  included hypertension (systolic blood pressure  $\geq 140$  mm Hg, or diastolic  $\geq 90$  mm Hg, or use of hypertension medication), diabetes (fasting glucose  $\geq 126$  mg/dL or use of diabetes medication), dyslipidemia (fasting total cholesterol  $\geq 200$  mg/dL, LDL  $\geq 130$  mg/dL, HDL <40 mg/dL, triglycerides  $\geq 150$  mg/dL or use of lipid-lowering medications with self-reported clinical diagnosis), and whether regimens were switched since cART initiation. Other treatment-related variables included calendar year of regimen at  $V_i$ , ART experience before cART initiation, and at  $V_{i-1}$ : cumulative years on cART; use of PIs, NNRTIs, and NRTIs; and duration on the regimen reported at  $V_{i-1}$ .

### Statistical Analysis

Poisson regression with robust variance was used to test for secular trends of regimen use, and to obtain rate ratios when examining associations between regimens and switching, adherence, and

HIV-1 RNA suppression. Given that regimens in the MACS were not randomly assigned and prescribing patterns may be affected by treatment history, levels of HIV RNA and CD4 count, and other covariates that prior treatments may affect, we used inverse-probability-of-treatment-and-censoring (IPTC) weighted [26, 27] regression models to control for time-varying confounding when assessing the effect of regimens on switching, adherence, and HIV RNA suppression. Specifically, a longitudinal unordered multinomial logistic model with time-varying regimens (7 regimen categories, with the most reported regimen as the reference category) as the outcome was used to generate stabilized weights. The logistic model for determining the numerator of the weights for regimens included all time-fixed covariates and treatment history variables, including calendar year of current regimen at  $V_i$ . To obtain the denominator of the weights, we also included all time-varying covariates. Similarly, a second logistic model determined the weights of remaining uncensored to control for informative dropout. The final stabilized weights were calculated by multiplying the weights of regimen use and weights of remaining uncensored. We truncated the final stabilized weights at 0.03 (the 1<sup>st</sup> percentile of overall weights) and 10 (99<sup>th</sup> percentile) to avoid huge influences by extreme weights [26, 28]. Predictors in the final IPTC-weighted Poisson models included regimen categories, time-fixed covariates, and treatment history at  $V_{i-1}$ . HIV RNA level  $\geq 200$  copies/mL (indicating current virologic failure) at  $V_i$  also was included in the IPTC-weighted model for switching. We used separate weighted models, including adherence at  $V_{i+1}$  for suppressed HIV RNA in the final weighted models. We also age-stratified IPTC-weighted Poisson models for all outcomes by dichotomizing age at 50 years, because some studies suggested that older people may have less immunologic response to ART [29, 30], which may affect clinical practice.

We conducted multiple imputation (MI) for missing data with 25 imputation data sets using multivariable normal models [31], including all three outcomes and all variables used in the generalized logit model to predict the probability of receiving different cART regimens that was used to generate stabilized weights. Specifically, MI imputed missing values for adherence (3% of 3598 person-visits), HIV RNA, HCV, smoking, alcohol drinking, marijuana, other recreational drugs, GI symptoms and CNS sleep-related symptoms, hypertension, depression, kidney disease (6–13%), dyslipidemia (20%), and diabetes (24%). The 25 complete data sets were each analyzed first, and their estimates were combined to calculate average effect estimates and standard errors incorporating the imputation variability [32]. All analyses were conducted with SAS version 9.4 (SAS Institute, Cary, NC).

## RESULTS

### cART Use: 2008–2017

A total of 1457 MACS participants reported using cART at 18 017 visits (87% of all HIV+ person-visits) in 2008–2017. The median age was 53 years across all visits; 46% were

non-Caucasian, 57% were enrolled from 2001 onwards, and 40% started cART before 2000. During 2008–2017, 40% of cART regimens across the person-visits were PI-based and 43% were NNRTI-based. As shown in Figure 1A, from 2008 to 2017, PI-cART use and NNRTI-cART use decreased from 50% to 25%, and 47% to 31%, respectively. Overall, 16% of the person-visits were INSTI-cART-based, which increased from 1% in 2008 to 44% in 2017.

As more INSTI-based regimens have been recently approved, we identified cART regimens commonly used in 2014–2017 (each regimen reported by >300 person-visits overall, Figure 1B). The use of efavirenz/tenofovir disoproxil fumarate/emtricitabine (EFV/TDF/FTC, Atripla) peaked at 26% in 2011 (Figure 1B), but then continuously decreased to 9% in 2017. The use of rilpivirine/TDF/FTC (RPV/TDF/FTC, Complera) and elvitegravir/cobicistat/TDF/FTC (EVG/c/TDF/FTC, Stribild) increased since approval in 2011 and 2012, respectively, and dropped after 2015 when dolutegravir/abacavir/lamivudine (DTG/ABC/3TC, Triumeq) and EVG/c/tenofovir alafenamide/FTC (EVG/c/TAF/FTC, Genvoya) became available. The usage of ritonavir-boosted atazanavir with TDF/FTC (ATV/r+TDF/FTC) dropped from 11% in 2008 to 1% to 2017. Similarly, darunavir/ritonavir+TDF/FTC (DRV/r+TDF/FTC) use continuously dropped from 8% in 2013 to 2% in 2017. Once daily multiclass single-pill regimens increased from 20% in 2008 to 51% in 2017. Percentage of visits with HIV RNA below 50 copies/mL slightly increased from 84% in 2008 to 89% in 2017. In 2017, about 83% cART users had HIV RNA <20 copies/mL.

### Initial cART Regimens

In 2008–2017, 431 men initiated cART with median age of 40 years in the MACS. The median (Q1–Q3) nadir CD4 cell count before initiation was 387 (282–537) cells/mm<sup>3</sup> and increased from 347 (265–437) in 2008–2010 to 533 (369–688) cells/mm<sup>3</sup> in 2014–2017 ( $P < .001$ ). The median (Q1–Q3) peak HIV RNA level before cART initiation was 54 400 (15 305–157 020) copies/mL overall and decreased from 55 015 (19 293–190 000) in 2008–2010 to 32 307 (4683–127 631) copies/mL in 2014–2017 ( $P = .010$ ). Similar to trends that were observed with overall cART use, percentages of participants on PI- or NNRTI-cART as initial regimens dropped, while the percent on INSTI-cART as initial regimen increased, especially after 2012 (Figure 2A). The use of EFV/TDF/FTC as the first regimen dropped from about 50% from 2008–2009 to 9% in 2015 and 0 in 2016, with increased use of EVG/c/TDF/FTC (1% to 41% from 2012 to 2015) and RPV/TDF/FTC (5% to 32% from 2011 to 2015) until 2015, when new once daily single-pill INSTI-regimens emerged. No one reported using DRV/r+TDF/FTC and ATV/r+TDF/FTC as initial regimens from 2015, and 2014 onwards, respectively. Among 16 men who initiated cART during 2016–2017, 14 initiated with INSTI-cART and 12 used single-pill regimens.

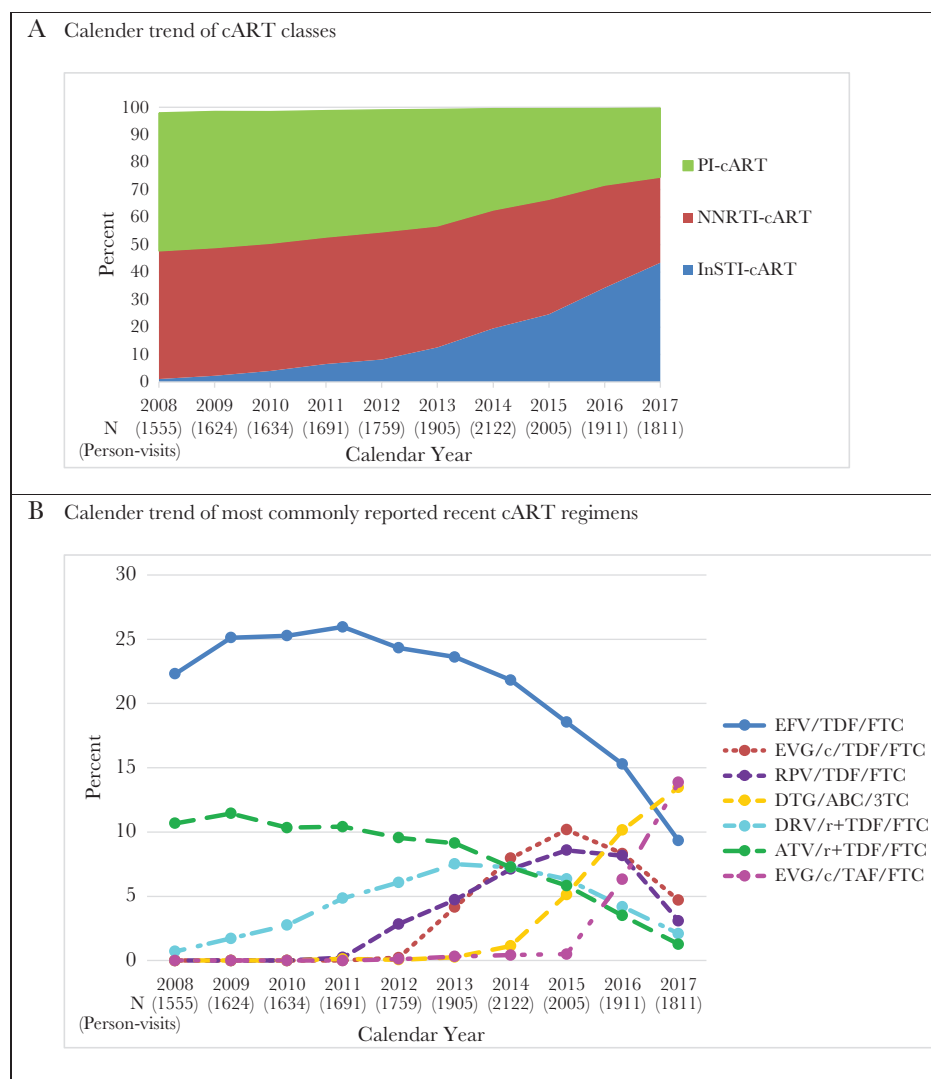

**Figure 1.** cART Classes and Recent Commonly Used Regimens in the Multicenter AIDS Cohort Study in 2008–2017. A, Calendar trend of cART classes; B, Calendar trend of most commonly reported recent cART regimens.

#### Comparative Effectiveness of cART Regimens 2014–2017

In 2014–2017, 729 men reported cART use for at least 2 consecutive visits (<1 year) contributing a total of 3598 paired visits ( $V_i$ ,  $V_{i+1}$ ). The 7 most popular regimens reported at  $V_i$  were as follows: (1) EFV/TDF/FTC (Atripla,  $n = 1161$ ), (2) EVG/c/TDF/FTC (Stribild,  $n = 551$ ), (3) RPV/TDF/FTC (Complera,  $n = 492$ ), (4) DTG/ABC/3TC (Triumeq,  $n = 401$ ), (5) DRV/r + TDF/FTC ( $n = 351$ ), (6) ATV/r + TDF/FTC ( $n = 333$ ), and (7) EVG/c/TAF/FTC (Genvoya,  $n = 309$ ). Overall, 32% of regimens reported at  $V_i$  were initial cART regimens. Among those who experienced ART before starting cART, 98% had used NRTI, 46% had used PI, and 21% had used NNRTI. From 2014 to 2017, the overall 16.5% cART switching rate reflected an increase from 13.4% (95% CI, 10.7%, 16.7%) in 2014 to 19.1% (95% CI, 16.9%, 21.5%) in 2017. Adherence to cART was relatively stable at approximately 90%, as was having <20 HIV RNA copies/mL (83–85%) (Figure 3).

To address potential confounding by indication (also known as channeling bias), we examined characteristics at  $V_{i-1}$  (the visit prior to  $V_i$ ) associated with use of regimens at  $V_i$  (Table 1). Compared to EFV/TDF/FTC users, more of the DRV/r + TDF/FTC users were Hispanic/other, and fewer EVG/c/TAF/FTC users were African American. These differences, together with differences by study site, hepatitis coinfection, behavioral characteristics, and health status persisted in the multivariable regression models predicting regimen use (Supplemental Table 1).

#### Regimen Effect on Switching

Switching was highest among ATV/r/TDF/FTC users (27.2%) and lowest among DTG/ABC/3TC users (5.5%); both differed from the 15.2% switching in the EFV/TDF/FTC reference group, which persisted after adjustment for factors associated



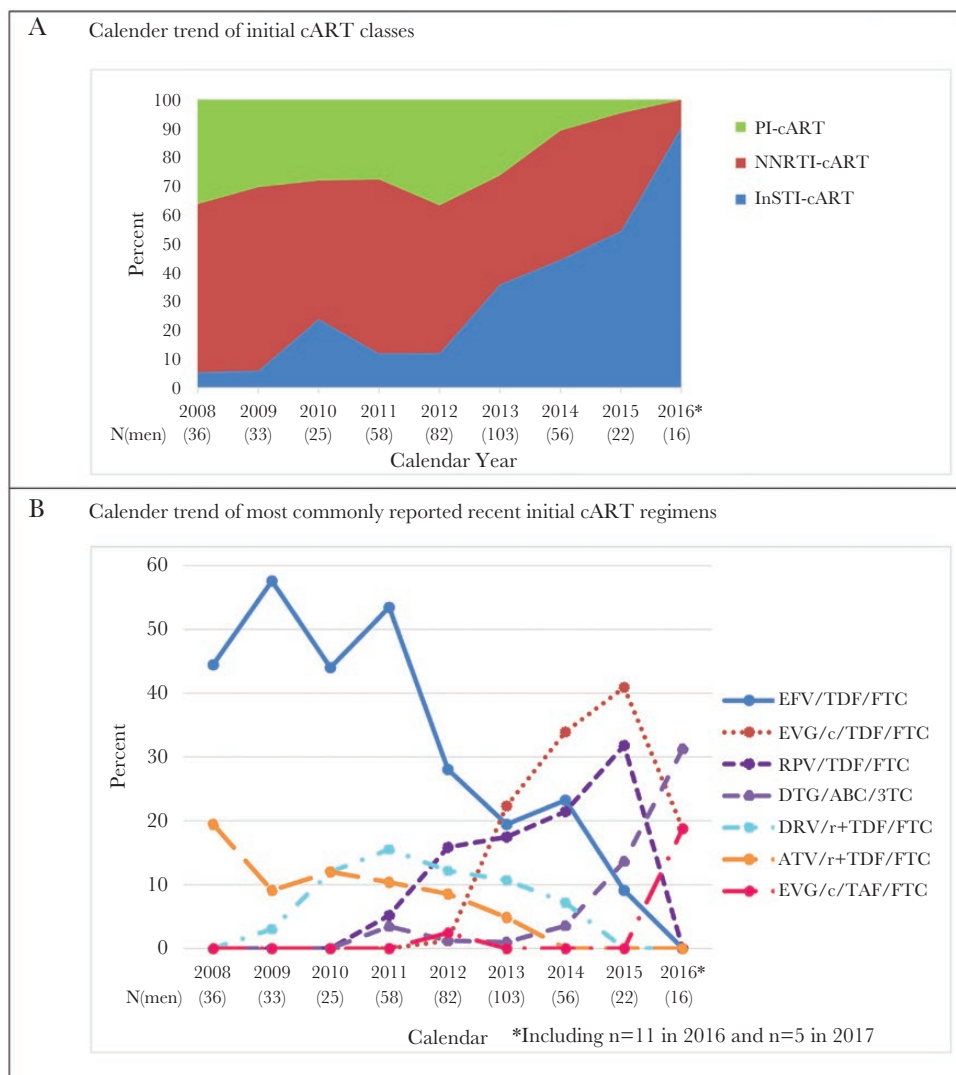

**Figure 2.** Initial cART Regimens in the Multicenter AIDS Cohort Study in 2008–2017. The last time point 2016\* includes 11 observations from 2016 and 5 observations from 2017. A, Calendar trend of initial cART classes; B, Calendar trend of most commonly reported recent initial cART regimens.

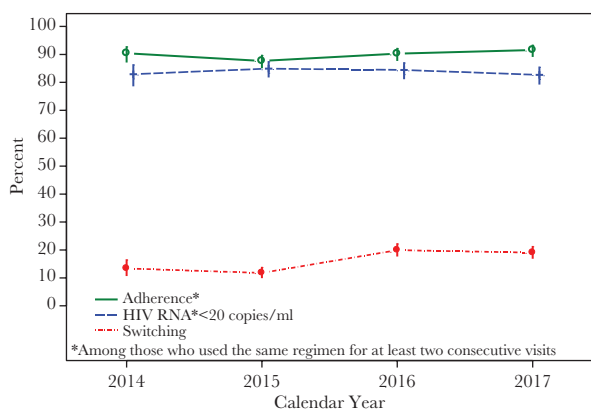

**Figure 3.** Percentages of Switching cART, Adherence to cART, and Having HIV RNA <20 copies/mL in the Multicenter AIDS Cohort Study in 2014–2017.

with their use (Figure 4A). Those using EVG/c/TAF/FTC also were less likely to switch (aRR = 0.12 [95% CI, 0.06, 0.27]). Given DTG/ABC/3TC was approved by U.S. Food and Drug Administration (FDA) in August 2014 and EVG/c/TAF/FTC was approved in November 2015, we had only 2–3 years of observations of these new regimens. In age-stratified analysis, those 50 years and older on PI-based regimens DRV/r+TDF/FTC (aRR = 1.94 [1.23, 3.06]) or ATV/r+TDF/FTC (aRR = 2.13 [1.36, 3.35]) were more likely to switch than the EFV/TDF/FTC users. In younger men, only ATV/r+TDF/FTC users were more likely to switch regimens (aRR = 1.90 [0.87, 4.14]).

We examined self-reported reasons for stopping medications; the majority reported stopping due to prescription changes made by their physicians (Supplemental Table 2). Stopping due to symptoms including CNS sleeping-related problems, such as nightmares/vivid dreams and insomnia/sleeping problems,

**Table 1. Characteristics at  $V_{i-1}$  by 7 cART Regimens Reported at  $V_i$  for 3598 Person-Visits From January 1, 2014 to December 31, 2017**

| Characteristics Median (Q1–Q3) or %           | EFV/TDF/FTC (Atripla) | EVG/c/TDF/FTC (Stribild) | RPV/TDF/FTC (Complera) | DTG/ABC/3TC (Triumeq) | DRV/r + TDF/FTC  | ATV/r + TDF/FTC  | EVG/c/TAF/FTC (Genvoya) |
|-----------------------------------------------|-----------------------|--------------------------|------------------------|-----------------------|------------------|------------------|-------------------------|
| Number of person-visits                       | 1161                  | 551                      | 492                    | 401                   | 351              | 333              | 309                     |
| Age (years)                                   | 53 (46–59)            | 48 (34–55)               | 48 (36–55)             | 57 (50–64)            | 48 (38–54)       | 54 (48–61)       | 54 (44–61)              |
| <b>Race</b>                                   |                       |                          |                        |                       |                  |                  |                         |
| Caucasian                                     | 56.6%                 | 50.5%                    | 43.1%                  | 51.9%                 | 27.6%            | 47.7%            | 59.5%                   |
| African American                              | 27.1%                 | 33.9%                    | 34.3%                  | 34.9%                 | 29.3%            | 41.4%            | 21.0%                   |
| Hispanic/other                                | 16.3%                 | 15.6%                    | 22.6%                  | 13.2%                 | 43.0%            | 10.8%            | 19.4%                   |
| <b>Center</b>                                 |                       |                          |                        |                       |                  |                  |                         |
| Baltimore/Washington DC                       | 19.5%                 | 29.8%                    | 24.4%                  | 35.7%                 | 12.5%            | 17.1%            | 27.8%                   |
| Chicago                                       | 27.6%                 | 30.7%                    | 15.9%                  | 14.2%                 | 25.1%            | 25.8%            | 34.0%                   |
| Pittsburgh/Columbus                           | 32.0%                 | 21.2%                    | 32.9%                  | 28.4%                 | 12.3%            | 35.4%            | 23.0%                   |
| Los Angeles                                   | 20.9%                 | 18.3%                    | 26.8%                  | 21.7%                 | 50.1%            | 21.6%            | 15.2%                   |
| Cohort enrolled after 2001                    | 64.3%                 | 78.0%                    | 78.7%                  | 53.1%                 | 85.2%            | 50.8%            | 64.4%                   |
| <b>Smoking status</b>                         |                       |                          |                        |                       |                  |                  |                         |
| Current                                       | 26.2%                 | 28.2%                    | 28.7%                  | 20.6%                 | 38.5%            | 29.4%            | 23.2%                   |
| Past                                          | 50.6%                 | 36.2%                    | 36.3%                  | 49.9%                 | 28.8%            | 40.2%            | 46.0%                   |
| Never                                         | 23.2%                 | 35.6%                    | 35.0%                  | 29.6%                 | 32.7%            | 30.4%            | 30.9%                   |
| Drinking $\geq 14$ drinks/week                | 7.4%                  | 12.4%                    | 5.8%                   | 9.0%                  | 7.7%             | 8.5%             | 12.5%                   |
| Used recreational drugs                       | 53.4%                 | 63.7%                    | 47.6%                  | 51.9%                 | 49.7%            | 53.1%            | 56.7%                   |
| Depression                                    | 18.4%                 | 30.4%                    | 24.7%                  | 28.0%                 | 35.3%            | 30.4%            | 26.1%                   |
| HBV-infection                                 | 3.9%                  | 2.7%                     | 4.9%                   | 0.5%                  | 3.3%             | 4.0%             | 4.2%                    |
| HCV-infection                                 | 4.6%                  | 3.0%                     | 5.1%                   | 10.3%                 | 6.1%             | 6.7%             | 5.7%                    |
| Had GI symptoms                               | 18.2%                 | 20.3%                    | 16.5%                  | 23.1%                 | 24.7%            | 17.1%            | 20.5%                   |
| Had CNS symptoms                              | 45.4%                 | 43.7%                    | 36.5%                  | 41.4%                 | 33.2%            | 38.3%            | 48.4%                   |
| Hypertension                                  | 53.5%                 | 36.6%                    | 38.3%                  | 63.7%                 | 35.0%            | 42.2%            | 51.9%                   |
| Diabetes                                      | 10.3%                 | 7.9%                     | 6.3%                   | 14.7%                 | 6.8%             | 17.0%            | 11.6%                   |
| Dyslipidemia                                  | 77.6%                 | 71.8%                    | 69.4%                  | 87.3%                 | 68.7%            | 75.3%            | 77.3%                   |
| Kidney disease                                | 17.1%                 | 12.3%                    | 12.9%                  | 31.8%                 | 12.8%            | 21.9%            | 18.1%                   |
| Experienced ART before cART                   | 31.8%                 | 20.1%                    | 21.7%                  | 45.9%                 | 30.2%            | 43.5%            | 31.7%                   |
| Calendar year of cART initiation              | 2004 (1999–2011)      | 2012 (2001–2014)         | 201 (2000–2013)        | 2002 (1998–2007)      | 2009 (1999–2012) | 2001 (1998–2007) | 2005 (1999–2012)        |
| Cumulative years on cART                      | 9.9 (4.4–14.2)        | 3.0 (1.3–11.1)           | 3.7 (1.6–11.7)         | 12.1 (7.2–15.5)       | 4.9 (2.6–12.6)   | 11.0 (6.8–14.7)  | 10.6 (3.8–15.4)         |
| Cumulative years on PI                        | 0.0 (0.0–3.0)         | 0.0 (0.0–2.5)            | 0.0 (0.0–3.8)          | 4.9 (0.0–9.8)         | 4.0 (2.0–10.3)   | 11.1 (7.1–14.5)  | 1.6 (0.0–9.3)           |
| Cumulative years on NNRTI                     | 8.3 (4.0–12.0)        | 0.1 (0.0–3.0)            | 2.4 (1.1–4.8)          | 3.7 (0.0–11.2)        | 0.0 (0.0–1.7)    | 0.0 (0.0–2.2)    | 2.3 (0.0–8.9)           |
| Cumulative years on NRTI                      | 10.7 (4.5–15.7)       | 3.2 (1.4–12.2)           | 4.0 (1.8–12.6)         | 13.7 (7.9–18.8)       | 5.0 (2.7–15.2)   | 13.8 (8.0–17.3)  | 12.0 (3.8–17.3)         |
| Duration of regimen (years)                   | 6.0 (2.7–8.3)         | 1.1 (0.3–1.9)            | 1.7 (0.7–2.9)          | 0.9 (0.3–1.9)         | 2.2 (0.7–3.8)    | 4.4 (1.7–7.7)    | 0.7 (0.3–2.1)           |
| Calendar year of current visit                | 2015 (2014–2016)      | 2015 (2014–2016)         | 2015 (2014–2016)       | 2016 (2016–2017)      | 2015 (2014–2016) | 2015 (2014–2015) | 2017 (2016–2017)        |
| <b>Number of times switched cART regimens</b> |                       |                          |                        |                       |                  |                  |                         |
| 0                                             | 39.3%                 | 45.2%                    | 47.5%                  | 9.8%                  | 34.3%            | 20.7%            | 13.3%                   |
| 1                                             | 27.6%                 | 15.9%                    | 18.7%                  | 14.3%                 | 15.7%            | 18.3%            | 22.7%                   |
| 2                                             | 15.6%                 | 15.9%                    | 12.2%                  | 19.8%                 | 19.1%            | 27.0%            | 21.7%                   |
| $\geq 3$                                      | 17.5%                 | 23.0%                    | 21.6%                  | 56.3%                 | 30.9%            | 33.9%            | 42.4%                   |
| Current CD4 count (cells/mm <sup>3</sup> )    | 697 (533–869)         | 661 (503–882)            | 707 (547–895)          | 650 (478–849)         | 658 (450–853)    | 669 (520–871)    | 714 (537–932)           |
| HIV RNA below 20 copies/mL                    | 88.4%                 | 74.4%                    | 80.8%                  | 82.8%                 | 69.6%            | 77.4%            | 82.8%                   |

Abbreviations: ABC, abacavir; ATV/r, ritonavir-boosted atazanavir; cART, combination of antiretroviral therapy; CNS, central nervous system sleep related symptoms, including nightmares, vivid dreams, or insomnia; DRV/r, ritonavir-boosted darunavir; DTG, dolutegravir; EFV, efavirenz; EVG/c, cobicistat-boosted elvitegravir; FTC, emtricitabine; GI, gastrointestinal symptoms, including diarrhea, nausea, vomiting, abdominal pain, or bloating; HBV, hepatitis B virus; HCV, hepatitis C virus; NNRTI, Non-Nucleoside Reverse Transcriptase Inhibitors; NRTI, Nucleoside/Nucleotide Reverse Transcriptase Inhibitors; PI, protease inhibitor; Q1, 25<sup>th</sup> percentile; Q3, 75<sup>th</sup> percentile; RPV, rilpivirine; TAF, tenofovir alafenamide; TDF, tenofovir disoproxil fumarate; 3TC, lamivudine.

were mostly reported by EFV/TDF/FTC users. EFV/TDF/FTC, EVG/c/TDF/FTC, DRV/r, or TDF/FTC (Truvada) users reported stopping for increased viral load. Stopping drugs to lower the number of pills or dosages was mostly reported by atazanavir (9%), darunavir (9%), ritonavir (8%) and TDF/FTC (Truvada, 9%) users. Side effects reported by users on INSTI regimens EVG/c/TAF/FTC or DTG/ABC/3TC included nausea/

vomiting and fatigue. About 4% reported stopping for personal decisions.

Of the 594 person-visit-pairs with switching, 11% discontinued all ART at  $V_{i+1}$ , but all resumed cART later during follow-up if  $V_{i+1}$  was not the last visit in analysis. Those on EFV/TDF/FTC switched to DTG/ABC/3TC most (18%). Among regimens that were switched, half of EVG/c/TDF/FTC, 19%

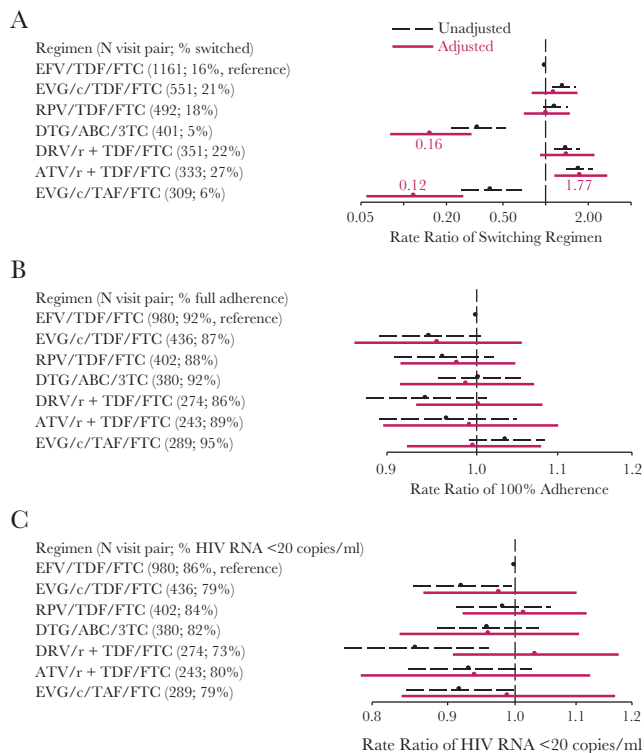

**Figure 4.** Results from Comparative Effectiveness Analyses of Current Commonly Used Regimens in 2014–2017. A, Rate ratio of switching cART by regimen; B, Rate ratio of 100% adherence to cART by regimen; and, C, Rate ratio of having HIV RNA <20 copies/mL by regimen. Black dots and dashed lines indicate unadjusted rate ratios and 95% confidence intervals, respectively. Red dots and solid lines indicate inverse-probability-of-treatment-and-censoring weighted (adjusted) rate ratios and 95% confidence intervals, respectively. ABC indicates abacavir; ATV/r, ritonavir-boosted atazanavir; DRV/r, ritonavir-boosted darunavir; DTG, dolutegravir; EFV, efavirenz; EVG/c, cobicistat-boosted elvitegravir; FTC, emtricitabine; RPV, rilpivirine; TAF, tenofovir alafenamide; TDF, tenofovir disoproxil fumarate; 3TC, lamivudine.

DTG/ABC/3TC, and 13% ATV/r+TDF/FTC switched to EVG/c/TAF/FTC; 25% of EVG/c/TAF/FTC switched to DTG+TAF/FTC. Those on RPV/TDF/FTC switched to RPV/TAF/FTC (Odefsey) the most (48%). Those on DRV/r+TDF/FTC switched to DRV/c(Prezcobix)+TAF/FTC (Descovy; 16%) the most.

#### Regimen Effect on Adherence and HIV RNA Suppression

We included 3004 visit-pairs with the same regimen at  $V_i$  and  $V_{i+1}$  in analyses of adherence and HIV RNA suppression. Complete adherence ranged from 86% by DRV/r+TDF/FTC users to 95% by EVG/c/TAF/FTC users. After adjustment, adherence did not differ by regimen type (Figure 4B).

Compared to the 86% of EFV/TDF/FTC users with suppressed HIV RNA to <20 copies/mL (Figure 4C), those on EVG/c/TDF/FTC (79%) or DRV/r+TDF/FTC (73%) or EVG/c/TAF/FTC (79%) had lower rates of HIV RNA suppression overall, but the differences attenuated after adjustment.

Among men younger than 50 years, we found that those on EVG/c/TDF/FTC were 15% (95% CI, 2%, 26%) less likely to suppress virus from the IPTC-weighted Poisson model, and in men 50 years and older, those on DRV/r+TDF/FTC had 18% (95% CI, 3%, 34%) higher rates of suppression than EFV/TDF/FTC users. These differences remained even after adjusting for adherence in the final model. We did not observe any differences in percentage change in CD4 cell count by regimen type (data not shown).

## DISCUSSION

We observed substantial decreases in using PI- or NNRTI-based regimens concomitant with a dramatic uptake of INSTI-cARTs overall and as the initial treatment for HIV in 2008–2017. Since 2015, most initiators started with one-pill once-daily INSTI-based regimens DTG/ABC/3TC or EVG/c/TAF/FTC, reflecting the US guidelines' recommendation [1].

EFV/TDF/FTC was the most commonly reported regimen in 2014–2017, probably because it was the first single-pill multiclass regimen for HIV infection approved by FDA (in July 2006). Prior to 2015, US guidelines recommended it for treatment-naïve patients. However, neuropsychiatric side effects reported by EFV users [33, 34] influenced the guidelines and subsequent practice.

With the recent uptake of new cART classes in clinical practice, it is important to examine their tolerability and effectiveness in real-world settings. We found that among the 7 cART regimens popular in 2014–2017, rates of switching differed. Also, switching by regimen depended on age: lower rates of switching were seen in users of the new INSTI-regimens EVG/c/TAF/FTC or DTG/ABC/3TC and higher rates of switching were observed in users of the multiple-pill regimen ATV/r+TDF/FTC overall, and in DRV/r+TDF/FTC users who were 50 years or older. We observed this difference in the IPTC-weighted models but not in traditional covariate-adjusted models, indicating the importance of appropriately controlling for confounding by indication. Although older men who used DRV/r+TDF/FTC were more likely to switch, those who remained on DRV/r+TDF/FTC had higher rates of HIV RNA <20 copies/ml, indicating that DRV/r+TDF/FTC was highly effective if users could tolerate it. We also observed that older DRV/r+TDF/FTC users had more experience of ART prior to DRV than the EFV/TDF/FTC users (data not shown), which makes sense from a clinical standpoint. Its use by men with more ART experience is consistent with use of darunavir as a salvage regimen. The observation period for new INSTI regimens was relatively short; assessment of switching among users of INSTI should continue. We observed that many who used TDF-containing regimens have switched to regimens containing TAF, reported as incurring less kidney damage than TDF [35–37]. More switching in older TDF/FTC users could be due to perceived safety risks of these drugs in

older patients (eg, bone or renal problems). However, long-term effects of new regimens are unknown.

We also found that about half of those who switched regimens reported stopping ART due to prescription changes without further reasons, and 8%–10% of those who stopped ATV, DRV, TDF/FTC, or RTV changed regimens to lower the number of pills. This might reflect the guideline changes and the availability of new approved cART regimens that have strong virologic efficacy, less side effects, and are easier to use [38, 39]. The switching off PI drugs also might reflect a desire to avoid drug interactions with concomitant medications. The economics of medication use (eg, cost and insurance) also may have influenced treatment decisions, but this was beyond the scope of the present study.

All regimens examined in our study had similar effects on adherence, and CD4 count change. An international randomized clinical trial in treatment-naïve women (WAVES) [39] found that EVG/c/TDF/FTC had superior efficacy and lower rate of discontinuation than ATV/r+TDF/FTC. We found that both regimens had similar efficacy in 6 months overall, but about 4% of those who stopped EVG/c/TDF/FTC reported the reason for stopping was increased HIV RNA, which was not reported by ATV/r+TDF/FTC users. When we stratified by age, we found that men younger than 50 years who used EVG/c/TDF/FTC had lower rates of having HIV RNA <20 copies/ml than EFV/TDF/FTC users, which was consistent with our observation of more EVG/c/TDF/FTC users reporting increased HIV RNA as the reason for stopping drug. The different findings in HIV RNA suppression might partially be due to different study populations and study designs, but this warrants further investigation of the effect of long-term use of EVG/c/TDF/FTC on HIV RNA suppression. Our finding of more switching by ATV/r+TDF/FTC users than users of other regimens was consistent with the WAVES' finding.

The trend of higher CD4 counts at initiation is an indicator of persons living with HIV accessing health care earlier in their infection, as promoted by guidelines and public health programs (<https://www.aids.gov/federal-resources/national-hiv-aids-strategy/strategy-implementation/strategy-in-action/>). This is highly relevant as early treatment not only improves individual prognosis but also decreases community viral load, and subsequent HIV transmission [40]. Although the study's MSM population may limit the generalizability of our findings to other populations, MSM comprise the majority (<https://www.hiv.gov/hiv-basics/overview/data-and-trends/statistics>) of those living with HIV in the US [41]. With the risk group and sociodemographic representation of the recent MACS initiators to that of men living with HIV today in the US [12, 41], our findings are highly encouraging.

These data are highly relevant for chronically-infected users of cART. Whereas current clinical trials usually include

treatment-naïve individuals, we were able to examine regimen uptake and effectiveness more broadly. In this analysis, 31% of our study sample were on their first cART regimens so more than two-thirds were treatment-experienced.

In summary, most recent cART initiators started with INSTI-containing single-pill regimens, consistent with guidelines. Findings indicate that factors beyond those studied here, such as the need for salvage therapy, unique personal characteristics, drug interactions, and cost, may influence treatment decisions.

### Supplementary Data

Supplementary materials are available at *Open Forum Infectious Diseases* online. Consisting of data provided by the authors to benefit the reader, the posted materials are not copyedited and are the sole responsibility of the authors, so questions or comments should be addressed to the corresponding author.

### Acknowledgments

Data in this manuscript were collected by the Multicenter AIDS Cohort Study (MACS). MACS (Principal Investigators): Johns Hopkins University Bloomberg School of Public Health (Joseph Margolick, Todd Brown), U01-AI35042; Northwestern University (Steven Wolinsky), U01-AI35039; University of California, Los Angeles (Roger Detels, Otoniel Martinez-Maza, Otto Yang), U01-AI35040; University of Pittsburgh (Charles Rinaldo, Lawrence Kingsley, Jeremy Martinson), U01-AI35041; the Center for Analysis and Management of MACS, Johns Hopkins University Bloomberg School of Public Health (Lisa Jacobson, Gypsyamber D'Souza), U01-AI35043. The MACS is funded primarily by the National Institute of Allergy and Infectious Diseases, with additional cofunding from the National Cancer Institute, the National Institute on Drug Abuse, and the National Institute of Mental Health. Targeted supplemental funding for specific projects also was provided by the National Heart, Lung, and Blood Institute and the National Institute on Deafness and Communication Disorders. MACS data collection is supported also by UL1-TR001079 (JHU Institute for Clinical and Translational Research [ICTR]) from the National Center for Advancing Translational Sciences (NCATS), a component of the National Institutes of Health (NIH), and the NIH Roadmap for Medical Research. The contents of this publication are solely the responsibility of the authors and do not represent the official views of the NIH, JHU ICTR, or NCATS. The MACS website is located at <http://aidscohortstudy.org/>.

**Financial support.** This work was supported by the National Institute of Allergy and Infectious Diseases at the National Institutes of Health (NIH), with additional cofunding from the National Cancer Institute, the National Institute on Drug Abuse, and the National Institute of Mental Health (grant numbers U01-AI35042, U01-AI35039, U01-AI35040, U01-AI35041, and U01-AI35043). Targeted supplemental funding for specific projects also was provided by the National Heart, Lung, and Blood Institute, and the National Institute on Deafness and Communication Disorders. MACS data collection is supported by UL1-TR001079 (Johns Hopkins Institute for Clinical and Translational Research) from the National Center for Advancing Translational Sciences, a component of the NIH, and the NIH Roadmap for Medical Research. It was also supported by a CTSI grant at LA Biomed Harbor-UCLA (UL1TR000124).

**Potential conflicts of interest.** T.T.B. has served as a consultant to Gilead Sciences, Merck, ViiV Healthcare, Bristol Myers Squibb, EMD-Serono, and Theratechnologies. J.P. has served as a member of Data and Safety Monitoring Board (DSMB) for a Pfizer study. All other authors: No reported conflicts of interest. All authors have submitted the ICMJE Form for Disclosure of Potential Conflicts of Interest. Conflicts that the editors consider relevant to the content of the manuscript have been disclosed.



## References

1. Panel on Antiretroviral Guidelines for Adults and Adolescents. Guidelines for the use of antiretroviral agents in HIV-1-infected adults and adolescents. Department of Health and Human Services. 2018. <https://aidsinfo.nih.gov/contentfiles/AdultandAdolescentGL003533.pdf>. Accessed October 23, 2018.
2. Antiretroviral Therapy Cohort Collaboration. Life expectancy of individuals on combination antiretroviral therapy in high-income countries: a collaborative analysis of 14 cohort studies. *Lancet* 2008; 372:293–9.
3. Detels R, Muñoz A, McFarlane G, et al. Effectiveness of potent antiretroviral therapy on time to AIDS and death in men with known HIV infection duration. Multicenter AIDS Cohort Study Investigators. *JAMA* 1998; 280:1497–503.
4. Jacobson LP, Li R, Phair J, et al. Evaluation of the effectiveness of highly active antiretroviral therapy in persons with human immunodeficiency virus using biomarker-based equivalence of disease progression. *Am J Epidemiol* 2002; 155:760–70.
5. Mocroft A, Vella S, Benfield TL, et al. Changing patterns of mortality across Europe in patients infected with HIV-1. EuroSIDA Study Group. *Lancet* 1998; 352:1725–30.
6. Vittinghoff E, Scheer S, O'Malley P, et al. Combination antiretroviral therapy and recent declines in AIDS incidence and mortality. *J Infect Dis* 1999; 179:717–20.
7. Gueler A, Moser A, Calmy A, et al; Swiss HIV Cohort Study, Swiss National Cohort. Life expectancy in HIV-positive persons in Switzerland: matched comparison with general population. *AIDS* 2017; 31:427–36.
8. Kaufmann GR, Perrin L, Pantaleo G, et al; Swiss HIV Cohort Study Group. CD4 T-lymphocyte recovery in individuals with advanced HIV-1 infection receiving potent antiretroviral therapy for 4 years: the Swiss HIV Cohort Study. *Arch Intern Med* 2003; 163:2187–95.
9. Murray JS, Elashoff MR, Iacono-Connors LC, Cvetkovich TA, Struble KA. The use of plasma HIV RNA as a study endpoint in efficacy trials of antiretroviral drugs. *AIDS* 1999; 13:797–804.
10. May MT, Gompels M, Delpech V, et al; UK Collaborative HIV Cohort (UK CHIC) Study. Impact on life expectancy of HIV-1 positive individuals of CD4+ cell count and viral load response to antiretroviral therapy. *AIDS* 2014; 28:1193–202.
11. Dinoso JB, Kim SY, Wiegand AM, et al. Treatment intensification does not reduce residual HIV-1 viremia in patients on highly active antiretroviral therapy. *Proc Natl Acad Sci U S A* 2009; 106:9403–8.
12. Althoff KN, Buchacz K, Hall HI, et al; North American AIDS Cohort Collaboration on Research and Design. U.S. trends in antiretroviral therapy use, HIV RNA plasma viral loads, and CD4 T-lymphocyte cell counts among HIV-infected persons, 2000 to 2008. *Ann Intern Med* 2012; 157:325–35.
13. Kamelian K, Lepik KJ, Chau W, et al. Prevalence of human immunodeficiency virus-1 integrase strand transfer inhibitor resistance in British Columbia, Canada between 2009 and 2016: a longitudinal analysis. *Open Forum Infect Dis* 2019; 6:ofz060.
14. Cohen C, Wohl D, Arribas JR, et al. Week 48 results from a randomized clinical trial of rilpivirine/emtricitabine/tenofovir disoproxil fumarate vs. efavirenz/emtricitabine/tenofovir disoproxil fumarate in treatment-naïve HIV-1-infected adults. *AIDS* 2014; 28:989–97.
15. Lennox JL, DeJesus E, Lazzarin A, et al; STARTMRK investigators. Safety and efficacy of raltegravir-based versus efavirenz-based combination therapy in treatment-naïve patients with HIV-1 infection: a multicentre, double-blind randomised controlled trial. *Lancet* 2009; 374:796–806.
16. Lennox JL, Landovitz RJ, Ribaud HJ, et al; ACTG A5257 Team. Efficacy and tolerability of 3 nonnucleoside reverse transcriptase inhibitor-sparing antiretroviral regimens for treatment-naïve volunteers infected with HIV-1: a randomized, controlled equivalence trial. *Ann Intern Med* 2014; 161:461–71.
17. Raffi F, Jaeger H, Quiros-Roldan E, et al; extended SPRING-2 Study Group. Once-daily dolutegravir versus twice-daily raltegravir in antiretroviral-naïve adults with HIV-1 infection (SPRING-2 study): 96 week results from a randomised, double-blind, non-inferiority trial. *Lancet Infect Dis* 2013; 13:927–35.
18. Wohl DA, Cohen C, Gallant JE, et al; GS-US-236-0102 Study Team. A randomized, double-blind comparison of single-tablet regimen elvitegravir/cobicistat/emtricitabine/tenofovir DF versus single-tablet regimen efavirenz/emtricitabine/tenofovir DF for initial treatment of HIV-1 infection: analysis of week 144 results. *J Acquir Immune Defic Syndr* 2014; 65:e118–20.
19. Zolopa A, Sax PE, DeJesus E, et al; GS-US-236-0102 Study Team. A randomized double-blind comparison of coformulated elvitegravir/cobicistat/emtricitabine/tenofovir disoproxil fumarate versus efavirenz/emtricitabine/tenofovir disoproxil fumarate for initial treatment of HIV-1 infection: analysis of week 96 results. *J Acquir Immune Defic Syndr* 2013; 63:96–100.
20. Detels R, Phair JB, Saah AJ, et al. Recent scientific contributions to understanding HIV/AIDS from the Multicenter AIDS Cohort Study. *J Epidemiol* 1992; 2:S11–9.
21. Dudley J, Jin S, Hoover D, et al. The Multicenter AIDS Cohort Study: retention after 9 ½ years. *Am J Epidemiol* 1995; 142:323–30.
22. Kaslow RA, Ostrow DG, Detels R, et al. The Multicenter AIDS Cohort Study: rationale, organization, and selected characteristics of the participants. *Am J Epidemiol* 1987; 126:310–8.
23. Kleeberger CA, Phair JB, Strathdee SA, et al. Determinants of heterogeneous adherence to HIV-antiretroviral therapies in the Multicenter AIDS Cohort Study. *J Acquir Immune Defic Syndr* 2001; 26:82–92.
24. Schneider MF, Margolick JB, Jacobson LP, et al. Improved estimation of the distribution of suppressed plasma HIV-1 RNA in men receiving effective antiretroviral therapy. *J Acquir Immune Defic Syndr* 2012; 59:389–92.
25. Howe CJ, Cole SR, Westreich DJ, et al. Splines for trend analysis and continuous confounder control. *Epidemiology* 2011; 22:874–5.
26. Cole SR, Hernán MA. Constructing inverse probability weights for marginal structural models. *Am J Epidemiol* 2008; 168:656–64.
27. Robins JM, Hernán MA, Brumback B. Marginal structural models and causal inference in epidemiology. *Epidemiology* 2000; 11:550–60.
28. Xiao Y, Moodie EM, Abrahamowicz M. Comparison of approaches to weight truncation for marginal structural Cox models. *Epidemiol Methods* 2013; 2:1–20.
29. Althoff KN, Justice AC, Gange SJ, et al. Virologic and immunologic response to HAART, by age and regimen class. *AIDS* 2010; 24:2469–79.
30. Moore RD, Keruly JC. CD4+ cell count 6 years after commencement of highly active antiretroviral therapy in persons with sustained virologic suppression. *Clin Infect Dis* 2007; 44:441–6.
31. Schafer JL. *Analysis of Incomplete Multivariate Data*. New York: Chapman & Hall; 1997.
32. Rubin DB. Multiple imputation after 18+ years. *JASA* 1996; 91:473–89.
33. Apostolova N, Funes HA, Blas-Garcia A, et al. Efavirenz and the CNS: what we already know and questions that need to be answered. *J Antimicrob Chemother* 2015; 70:2693–708.
34. Mollan KR, Smurzynski M, Eron JJ, et al. Association between efavirenz as initial therapy for HIV-1 infection and increased risk for suicidal ideation or attempted or completed suicide: an analysis of trial data. *Ann Intern Med* 2014; 161:1–10.
35. Angione SA, Cherian SM, Özdener AE. A review of the efficacy and safety of Genvoya® (Elvitegravir, Cobicistat, Emtricitabine, and Tenofovir Alafenamide) in the management of HIV-1 infection. *J Pharm Pract* 2018; 31:216–21.
36. Gallant JE, Daar ES, Raffi F, et al. Efficacy and safety of tenofovir alafenamide versus tenofovir disoproxil fumarate given as fixed-dose combinations containing emtricitabine as backbones for treatment of HIV-1 infection in virologically suppressed adults: a randomised, double-blind, active-controlled phase 3 trial. *Lancet HIV* 2016; 3:e158–65.
37. Sax PE, Wohl D, Yin MT, et al; GS-US-292-0104/0111 Study Team. Tenofovir alafenamide versus tenofovir disoproxil fumarate, coformulated with elvitegravir, cobicistat, and emtricitabine, for initial treatment of HIV-1 infection: two randomised, double-blind, phase 3, non-inferiority trials. *Lancet* 2015; 385:2606–15.
38. Molina JM, Clotet B, van Lunzen J, et al; FLAMINGO study team. Once-daily dolutegravir versus darunavir plus ritonavir for treatment-naïve adults with HIV-1 infection (FLAMINGO): 96 week results from a randomised, open-label, phase 3b study. *Lancet HIV* 2015; 2:e127–36.
39. Squires K, Kityo C, Hodder S, et al. Integrase inhibitor versus protease inhibitor based regimen for HIV-1 infected women (WAVES): a randomised, controlled, double-blind, phase 3 study. *Lancet HIV* 2016; 3:e410–20.
40. Gardner EM, McLees MP, Steiner JF, Del Rio C, Burman WJ. The spectrum of engagement in HIV care and its relevance to test-and-treat strategies for prevention of HIV infection. *Clin Infect Dis* 2011; 52:793–800.
41. Centers for Disease Control and Prevention. HIV Surveillance Report, 2017; vol. 29. <http://www.cdc.gov/hiv/library/reports/hiv-surveillance.html>. Published November 2018. Accessed July 29, 2019.
